# Supplementary material for: Total structural determination of alloyed Au15.37Cu16.63(S-Adm)20 nanoclusters with double superatomic chains
Source: Royal Society of Chemistry journal article supplement (doi:10.1039/d0cc07482a), 2021-01-01
Supplement: d0cc07482a1.pdf [file d0cc07482a1.pdf]

Supporting Information for:

**Total Structural Determination of Alloyed Au<sub>15.37</sub>Cu<sub>16.63</sub>(S-Adm)<sub>20</sub>**

**Nanocluster with Double Superatomic Chains**

Li Tang, <sup>a, b</sup> Shiyao Deng, <sup>c</sup> Shuxin Wang, <sup>b, \*</sup> Yong Pei, <sup>c, \*</sup> Manzhou Zhu <sup>a, \*</sup>

<sup>a</sup>*Department of Chemistry and Centre for Atomic Engineering of Advanced Materials, Anhui Province, Key Laboratory of Chemistry for Inorganic/Organic Hybrid Functionalized Materials, Anhui University, Hefei, Anhui, 230601, P. R. China. E-mail: [zmz@ahu.edu.cn](mailto:zmz@ahu.edu.cn)*

<sup>b</sup>*College of Materials Science and Engineering, Qingdao University of Science and Technology, Qingdao 266042, P. R. China. E-mail: [shuxin\\_wang@qust.edu.cn](mailto:shuxin_wang@qust.edu.cn)*

<sup>c</sup>*Department of Chemistry, Key Laboratory of Environmentally Friendly Chemistry and Applications of Ministry of Education, Xiangtan University, Hunan Province, China, 411105, P.R. China. E-mail: [ypei2@xtu.edu.cn](mailto:ypei2@xtu.edu.cn)*

## Table of Contents

### Section 1. Experimental Procedures

Materials and Synthesis

Characterization

Theoretical method

### Section 2. Supplementary Figures

Figure S1. UV-vis spectrum of  $\text{Au}_{15.37}\text{Cu}_{16.63}(\text{S-Adm})_{20}$  nanocluster.

Figure S2. X-ray photoelectron spectroscopy (XPS) of  $\text{Au}_{15.37}\text{Cu}_{16.63}(\text{S-Adm})_{20}$  nanocluster.

Figure S3. SEM image and energy-dispersive X-ray spectrum(EDX) of  $\text{Au}_{15.4}\text{Cu}_{16.6}(\text{S-Adm})_{20}$ .

Figure S4.  $^2\text{H}$ -NMR spectrum of  $\text{Au}_{15.37}\text{Cu}_{16.63}(\text{S-Adm})_{20}$  nanocluster.

Figure S5. MS result of the  $\text{Au}_{15.4}\text{Cu}_{16.6}(\text{S-Adm})_{20}$  nanocluster.

Figure S6. Unit cell comprising one  $\text{Au}_{15.37}\text{Cu}_{16.63}(\text{SR})_{20}$  nanocluster.

Figure S7. Au-Au bond length of between two chains.

Figure S8. UV-vis spectrum and the metal occupancy information of  $(\text{AuCu})_{32}\text{-II/III}$  in various molar ratio.

Figure S9. Au-Au bond lengths distribution of tetrahedrons.

Figure S10. Photograph of  $\text{Au}_{15.37}\text{Cu}_{16.63}(\text{S-Adm})_{20}$  crystal.

### Section 3. Supplementary Tables

Table S1. Atom ratio of Au and Cu in  $\text{Au}_{15.37}\text{Cu}_{16.63}(\text{S-Adm})_{20}$ .

Table S2. Distribution of bond lengths of Au-Au and Au-Cu bonds in tetrahedrons ( $\text{\AA}$ ).

Table S3. Crystal data and structure refinement for  $\text{Au}_{15.37}\text{Cu}_{16.63}(\text{S-Adm})_{20}$ .

## 1. Experimental section

### Materials

Tetrachloroauric(III) acid ( $\text{HAuCl}_4 \cdot 3\text{H}_2\text{O}$ , >99.99% metals basis, Aldrich), copper chloride ( $\text{CuCl}_2 \cdot 2\text{H}_2\text{O}$ , >99.99% metals basis, Aldrich), 1-adamantanethiolate (HS-Adm, 98%), sodium borohydride ( $\text{NaBH}_4$ , Aldrich), Dichloromethane (HPLC grade,  $\geq 99.5\%$ , Aldrich), methanol (HPLC grade,  $\geq 99.9\%$ ), ethanol (HPLC grade,  $\geq 99.9\%$ ), ether (HPLC grade,  $\geq 99.9\%$ ), pure water purchased from Wahaha Co. Ltd.

Note: All chemicals were used without further purification. All glassware was thoroughly cleaned with aquaregia ( $\text{HCl}/\text{HNO}_3 = 3:1$  vol%), rinsed with copious pure water, and then dried in an oven prior to use.

### Synthesis of $\text{Au}_{15.37}\text{Cu}_{16.63}(\text{S-Adm})_{20}$ NCs

For the nanocluster synthesis,  $\text{HAuCl}_4 \cdot 3\text{H}_2\text{O}$  (0.075 mmol, 30 mg) was dissolved in 1 mL  $\text{H}_2\text{O}$  and  $\text{CuCl}_2$  (10 mg, 0.074 mmol) was dissolved in  $\text{CH}_3\text{OH}$  (3 mL) and  $\text{CH}_2\text{Cl}_2$  (15 mL) with sonication. The solution was vigorously stirred (ca. 1500 rpm) with magnetic stirring for 20 min. Then, HS-Adm (200 mg, 1.2 mmol) was added and vigorously stirred (ca. 1500 rpm) for another 15 min. The  $\text{CH}_2\text{Cl}_2$  phase changed from orange to light yellow and finally to colorless within 15 min.  $\text{NaBH}_4$  (2.64 mmol, 100 mg) dissolved in 5 mL ice-cold pure water was quickly added to the solution; the colorless solution turned dark immediately. The reaction was continued for 12 h under a  $\text{N}_2$  atmosphere. After that, the aqueous layer was removed, the mixture in the organic phase was dried by using a rotary evaporator, more methanol was added to wash away excess ligand, and precipitate was extracted by using  $\text{CH}_2\text{Cl}_2$ . This process was repeated many times. The yield of  $\text{Au}_{15.37}\text{Cu}_{16.63}(\text{S-Adm})_{20}$  is >70% (Au atom basis). The as-prepared nanocluster was crystallized in  $\text{CH}_2\text{Cl}_2/\text{C}_4\text{H}_{10}\text{O}$  at room temperature.

Rod-like single crystals were crystallized in  $\text{CH}_2\text{Cl}_2/\text{C}_4\text{H}_{10}\text{O}$  at room temperature over 3-4 days. (Figure S10).

## 2. Characterization

All UV-Vis absorption spectra of nanoclusters were recorded using an Agilent 8453. Samples were dissolved in  $\text{CH}_2\text{Cl}_2$  to make a dilute solution and then moved to a quartz dish, followed by spectral measurements.

X-ray photoelectron spectroscopy (XPS) measurements were performed on a Thermo ESCALAB 250, with a monochromated  $\text{AlK}\alpha$  (1486.8 eV) 150 W X-ray source, 0.5 mm circular spot size, a flood gun to counter charging effects, and analysis chamber base pressure lower than  $1 \times 10^{-9}$  mbar. Data were collected with  $\text{FAT} = 20$  eV. The sample was directly infused into the chamber at 5  $\mu\text{L}/\text{min}$ .

Nuclear magnetic resonance (NMR) analysis was performed on a Bruker Avance spectrometer operating at 400 MHz for  $^2\text{H}$ -NMR.  $\text{CD}_2\text{Cl}_2$  was used as the solvent to dissolve  $\sim 10$  mg clusters synthesized by  $\text{NaBD}_4$ .

The  $\text{Au}_{15.4}\text{Cu}_{16.6}(\text{S-Adm})_{20}$  nanocluster crystal data collection for single crystal X-ray diffraction was carried out on Stoe Stadivari diffractometer at 170 K, using  $\text{Cu-K}\alpha$  radiation ( $\lambda = 1.54186 \text{ \AA}$ ). With the aid of Olex2, the structure was solved with the ShelXT structure solution program using Intrinsic Phasing, and refined with the ShelXL refinement package using Least Squares minimization. Detailed data was provided in Table S3.

## 3. Theoretical method

The geometric optimization of clusters and the electronic structure calculations were performed based on the density functional theory (DFT), using the Gaussian 09 software package<sup>S1</sup> at the PBE0<sup>S2</sup>/LanL2DZ<sup>S3-S5</sup> (metal) and 6-31 G(d) (other) levels<sup>S6-S8</sup>. The ground state wave function, determined by the DFT calculation, was then used as an input file of Multiwfn software package<sup>S9</sup> to carry out the Adaptive Natural Density Partitioning (ADNDP) analysis.

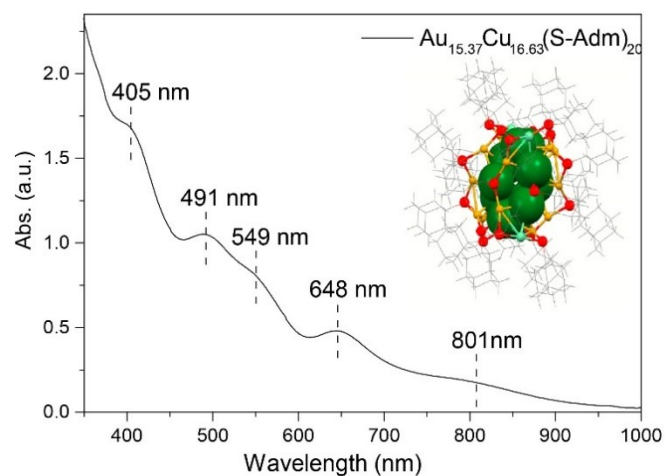

**Figure S1** UV-vis absorption spectrum of  $\text{Au}_{15.37}\text{Cu}_{16.63}(\text{S-Adm})_{20}$  nanocluster in  $\text{CH}_2\text{Cl}_2$ , inset, along with the structure obtained by X-ray crystallography. Colours in the atomistic structures: green, Au; orange, Cu; red, S; turquoise, Au/Cu; gray, C/H.

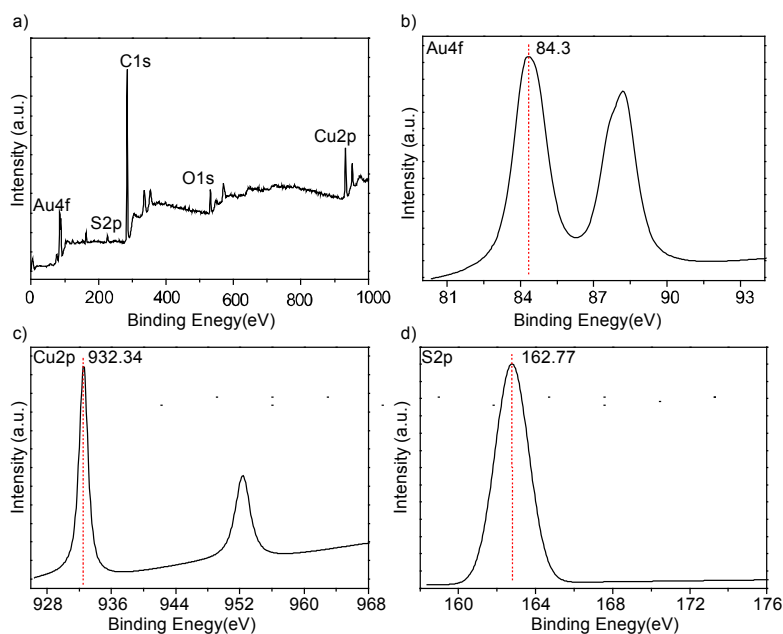

**Figure S2** X-ray photoelectron spectroscopy (XPS) of  $\text{Au}_{15.37}\text{Cu}_{16.63}(\text{S-Adm})_{20}$  nanocluster. a) XPS, b) Au4f, c) Cu2p, d) S2p in  $\text{Au}_{15.37}\text{Cu}_{16.63}(\text{S-Adm})_{20}$  nanocluster.

**Table S1** The atomic ratio of Au, Cu and S in  $\text{Au}_{15.37}\text{Cu}_{16.63}(\text{S-Adm})_{20}$  NCs calculated from X-ray photoelectric spectroscopy (XPS) measurements.

| Measurement              | Au (%) | Au (%) | S(%)  |
|--------------------------|--------|--------|-------|
| XPS results              | 29.41  | 31.38  | 39.21 |
| crystal analysis results | 15.5   | 16.6   | 20    |

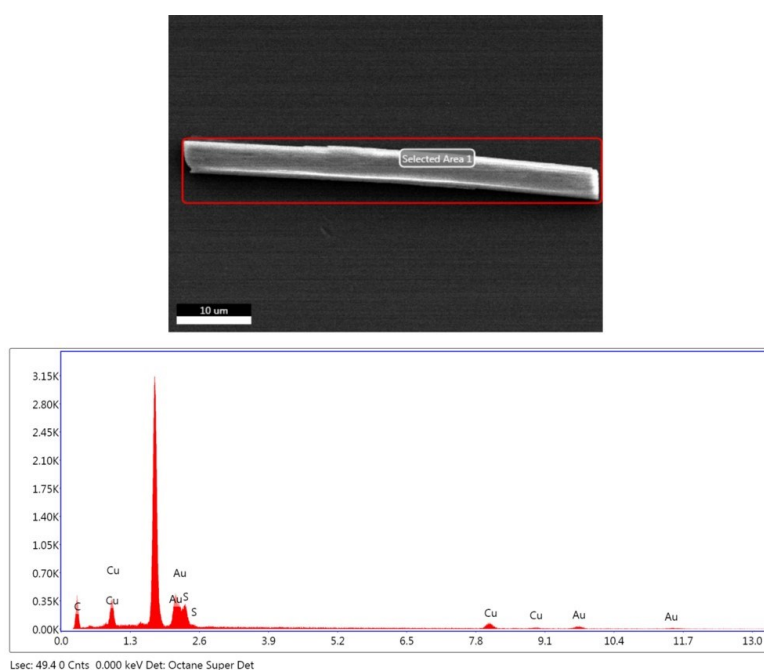

**Figure S3** SEM image and energy-dispersive X-ray spectrum (EDX) of  $\text{Au}_{15.37}\text{Cu}_{16.63}(\text{SR})_{20}$ .

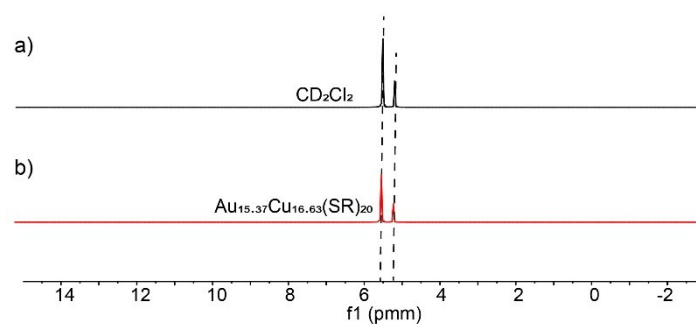

**Figure S4**  $^2\text{H}$ -NMR spectrum a)  $\text{CD}_2\text{Cl}_2$  b)  $\text{Au}_{15.37}\text{Cu}_{16.63}(\text{SR})_{20}$  nanocluster in  $\text{CD}_2\text{Cl}_2$ .

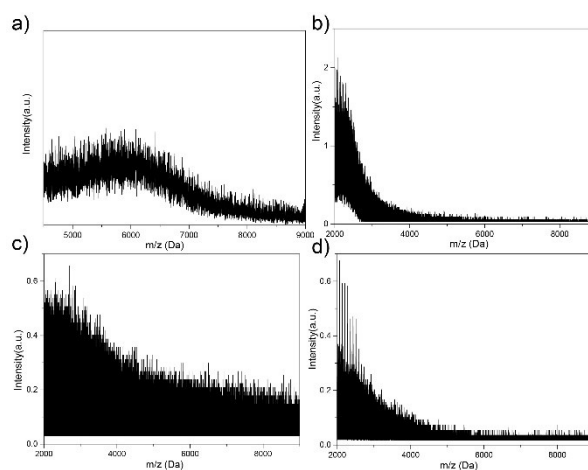

**Figure S5.** MS result of the  $\text{Au}_{15.37}\text{Cu}_{16.63}(\text{S-Adm})_{20}$  nanocluster. a) Positive-mode MALDI mass spectrum result; b) The ESI mass spectrum of the  $\text{Au}_{15.37}\text{Cu}_{16.63}(\text{S-Adm})_{20}$  nanocluster in positive mode by adding  $\text{Cs}^+$ ; c) The ESI mass spectrum of the  $\text{Au}_{15.37}\text{Cu}_{16.63}(\text{S-Adm})_{20}$  nanocluster in positive mode; d) The ESI mass spectrum of the  $\text{Au}_{15.37}\text{Cu}_{16.63}(\text{S-Adm})_{20}$  nanocluster in negative mode.

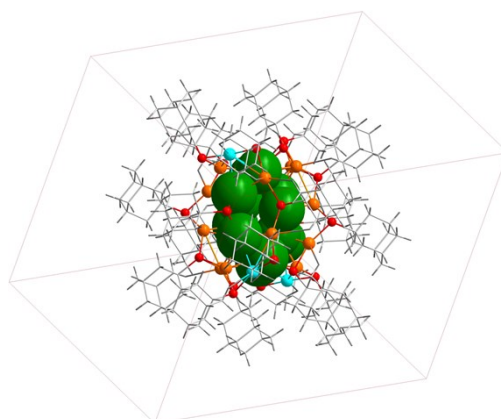

**Figure S6** Unit cell comprising one  $\text{Au}_{15.37}\text{Cu}_{16.63}(\text{SR})_{20}$  nanocluster.

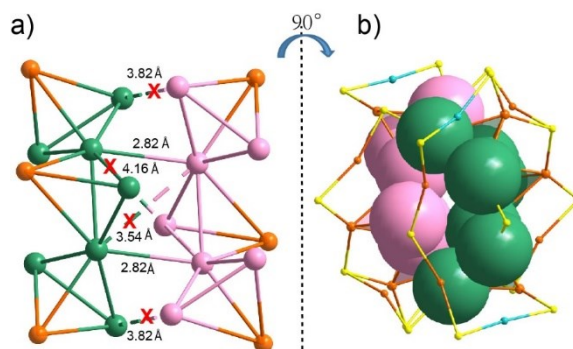

**Figure S7** a) main view of Au-Au bond length of between two chains. b) side view of tunnel structure of  $\text{Au}_{15.37}\text{Cu}_{16.63}(\text{SR})_{20}$  nanocluster.

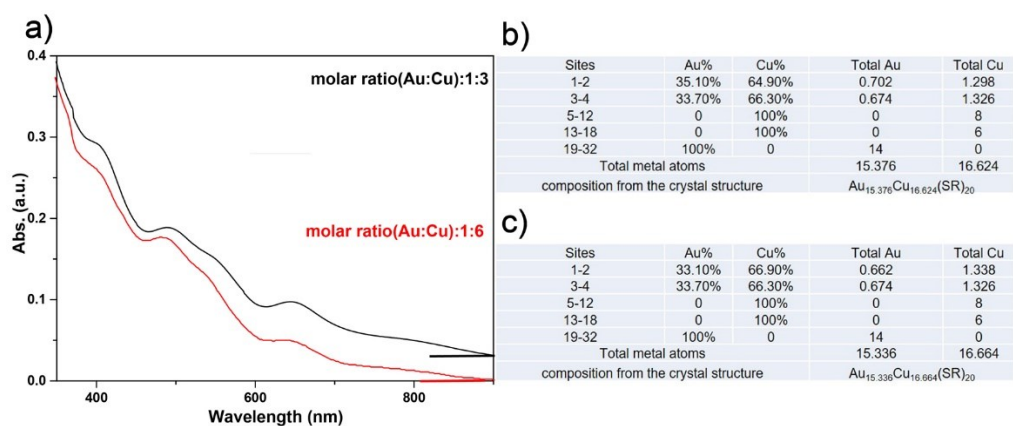

**Figure S8** UV-vis spectrum and the metal occupancy information of  $(\text{AuCu})_{32}\text{-II/III}$  in various molar ratio. a) UV-vis absorption spectrum of  $(\text{AuCu})_{32}\text{-II}$  (black) and  $(\text{AuCu})_{32}\text{-III}$  (red). The occupancy information of metal sites 1-32 in  $(\text{AuCu})_{32}\text{-II}$  (b) and  $(\text{AuCu})_{32}\text{-III}$  (c) nanoclusters.

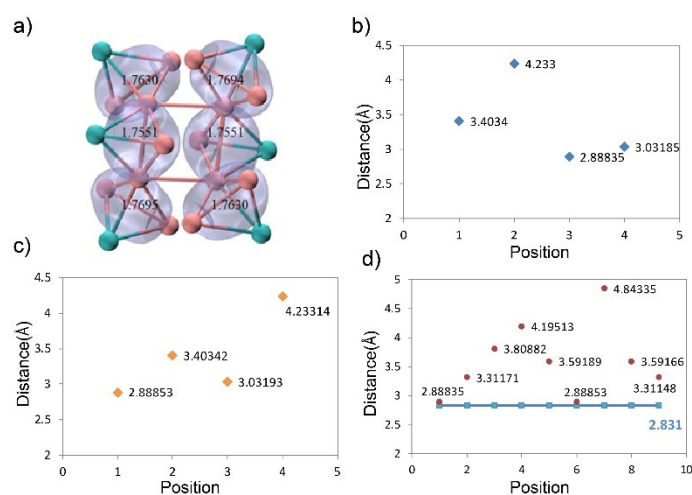

**Figure S9** a) The density contour of six 4c-2e orbitals of the  $12e \text{Au}_{14}\text{Cu}_6^{8+}$  core according to the ADNDP analysis (Color code: pink= Au, cyan=Cu). Au-Au bond lengths distribution of tetrahedrons. b) The distance between Au atoms of tetrahedron 1,6. c) The distance between Au atoms of tetrahedron 3,4. d) The distance between Au atoms of tetrahedron 2,5.

**Table S2** Distribution of bond lengths of Au-Au and Au-Cu bonds in tetrahedrons ( $\text{\AA}$ ).

| Tetrahedron | Bond Type | Distance | Tetrahedron | Bond Type | Distance | Tetrahedron | Bond Type | Distance |
|-------------|-----------|----------|-------------|-----------|----------|-------------|-----------|----------|
| 1           | Au-Au     | 2.748    | 2           | Au-Au     | 2.762    | 3           | Au-Au     | 2.702    |
|             | Au-Au     | 2.758    |             | Au-Au     | 2.777    |             | Au-Au     | 2.780    |
|             | Au-Au     | 2.864    |             | Au-Au     | 2.831    |             | Au-Au     | 2.929    |
|             | Au-Cu     | 2.649    |             | Au-Cu     | 2.672    |             | Au-Cu     | 2.641    |
|             | Au-Cu     | 2.687    |             | Au-Cu     | 2.723    |             | Au-Cu     | 2.796    |
|             | Au-Cu     | 2.780    |             | Au-Cu     | 2.756    |             | Au-Cu     | 2.841    |
| 4           | Au-Au     | 2.748    | 5           | Au-Au     | 2.762    | 6           | Au-Au     | 2.702    |
|             | Au-Au     | 2.758    |             | Au-Au     | 2.777    |             | Au-Au     | 2.780    |
|             | Au-Au     | 2.864    |             | Au-Au     | 2.831    |             | Au-Au     | 2.929    |
|             | Au-Cu     | 2.649    |             | Au-Cu     | 2.672    |             | Au-Cu     | 2.641    |
|             | Au-Cu     | 2.687    |             | Au-Cu     | 2.723    |             | Au-Cu     | 2.796    |
|             | Au-Cu     | 2.780    |             | Au-Cu     | 2.756    |             | Au-Cu     | 2.841    |

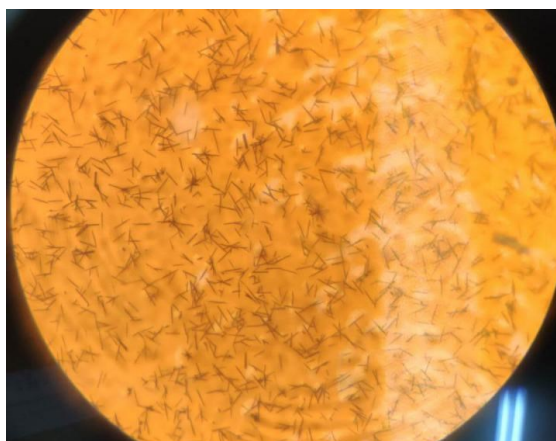

**Figure S10** Photograph of  $\text{Au}_{15.37}\text{Cu}_{16.63}(\text{S-Adm})_{20}$  crystals.



**Table S3** Crystal data and structure refinement for the Au<sub>15.37</sub>Cu<sub>16.63</sub>(S-Adm)<sub>20</sub>.

|                                                |                                                                                           |                  |
|------------------------------------------------|-------------------------------------------------------------------------------------------|------------------|
| Identification code                            | Au <sub>15.37</sub> Cu <sub>16.63</sub> (S-Adm) <sub>20</sub>                             |                  |
| Empirical formula                              | C <sub>200</sub> H <sub>300</sub> Au <sub>15.37</sub> Cu <sub>16.63</sub> S <sub>20</sub> |                  |
| Formula weight                                 | 7429.63                                                                                   |                  |
| Temperature/K                                  | 120                                                                                       |                  |
| Wavelength/Å                                   | 1.54186                                                                                   |                  |
| Crystal system                                 | triclinic                                                                                 |                  |
| Space group                                    | P-1                                                                                       |                  |
| Unit cell dimensions                           | a = 17.4596(9) Å                                                                          | α = 103.748(4) ° |
|                                                | b = 18.8819(10) Å                                                                         | β = 110.733(4) ° |
|                                                | c = 19.6255(10) Å                                                                         | γ = 93.756(4) °  |
| Volume/Å <sup>3</sup>                          | 5797.3(5)                                                                                 |                  |
| Z                                              | 1                                                                                         |                  |
| Density (calculated)/Mg/m <sup>3</sup>         | 2.128                                                                                     |                  |
| Absorption coefficient/mm <sup>-1</sup>        | 21.334                                                                                    |                  |
| F(000)                                         | 3516                                                                                      |                  |
| Theta range for data collection/°              | 2.972 to 67.500                                                                           |                  |
| Index ranges                                   | -20 ≤ h ≤ 18, -15 ≤ k ≤ 22, -23 ≤ l ≤ 19                                                  |                  |
| Reflections collected                          | 49313                                                                                     |                  |
| Independent reflections                        | 20077 [R(int) = 0.0985]                                                                   |                  |
| Completeness to theta = 25.242°                | 96%                                                                                       |                  |
| Max. and min. transmission                     | 0.9811 and 0.3484                                                                         |                  |
| Data / restraints / parameters                 | 1137/2710/20077                                                                           |                  |
| Goodness-of-fit on F <sup>2</sup>              | 0.997                                                                                     |                  |
| Final R indices [I > 2σ(I)]                    | R1 = 0.0856, wR2 = 0.2071                                                                 |                  |
| R indices (all data)                           | R1 = 0.1261, wR2 = 0.2247                                                                 |                  |
| Largest diff. peak and hole/ e Å <sup>-3</sup> | 5.965 and -5.120                                                                          |                  |

## References

- S1. Gaussian 09, Revision A.1, M. J. Frisch, G. W. Trucks, H. B. Schlegel, G. E. Scuseria, M. A. Robb, J. R. Cheeseman, G. Scalmani, V. Barone, B. Mennucci, G. A. Petersson, H. Nakatsuji, M. Caricato, X. Li, H. P. Hratchian, A. F. Izmaylov, J. Bloino, G. Zheng, J. L. Sonnenberg, M. Hada, M. Ehara, K. Toyota, R. Fukuda, J. Hasegawa, M. Ishida, T. Nakajima, Y. Honda, O. Kitao, H. Nakai, T. Vreven, J. A. Montgomery, Jr., J. E. Peralta, F. Ogliaro, M. Bearpark, J. J. Heyd, E. Brothers, K. N. Kudin, V. N. Staroverov, R. Kobayashi, J. Normand, K. Raghavachari, A. Rendell, J. C. Burant, S. S. Iyengar, J. Tomasi, M. Cossi, N. Rega, J. M. Millam, M. Klene, J. E. Knox, J. B. Cross, V. Bakken, C. Adamo, J. Jaramillo, R. Gomperts, R. E. Stratmann, O. Yazyev, A. J. Austin, R. Cammi, C. Pomelli, J. W. Ochterski, R. L. Martin, K. Morokuma, V. G. Zakrzewski, G. A. Voth, P. Salvador, J. J. Dannenberg, S. Dapprich, A. D. Daniels, O. Farkas, J. B. Foresman, J. V. Ortiz, J. Cioslowski, and D. J. Fox, Gaussian, Inc., Wallingford CT, 2009.
- S2. Matthias Ernzerhof and G. E. Scuseria, *J. Chem. Phys.*, 1999, **110**, 5029.
- S3. T. H. Dunning Jr. and P. J. Hay, Ed. H. F. Schaefer III, 1977, **3**, 1-28.
- S4. P. J. Hay and W. R. Wadt, *J. Chem. Phys.*, 1985, **82**, 270-83.
- S5. W. R. Wadt and P. J. Hay, *J. Chem. Phys.*, 1985, **82**, 284-98.
- S6. P. C. Hariharan and J. A. Pople, *Theor. Chem. Acc.*, 1973, **28**, 213-22.
- S7. R. Ditchfield, W. J. Hehre, and J. A. Pople, *J. Chem. Phys.*, 1971, **54**, 724.
- S8. G. A. Petersson, A. Bennett, T. G. Tensfeldt, M. A. Allaham, W. A. Shirley, and J. Mantearis, *J. Chem. Phys.*, 1988, **89**, 2193-218.
- S9. T. Lu, F. Chen, *Journal of Computational Chemistry*, 2012, **33**, 580–592.
